# Supplementary material for: Biological macromolecule cross linked TPP–chitosan complex: a novel nanohybrid for improved ovulatory activity against PCOS treatment in female rats
Source: Royal Society of Chemistry journal article supplement (doi:10.1039/c6ra07228c), 2016-01-01
Supplement: c6ra07228c1.pdf [file c6ra07228c1.pdf]

### Supplementary figures

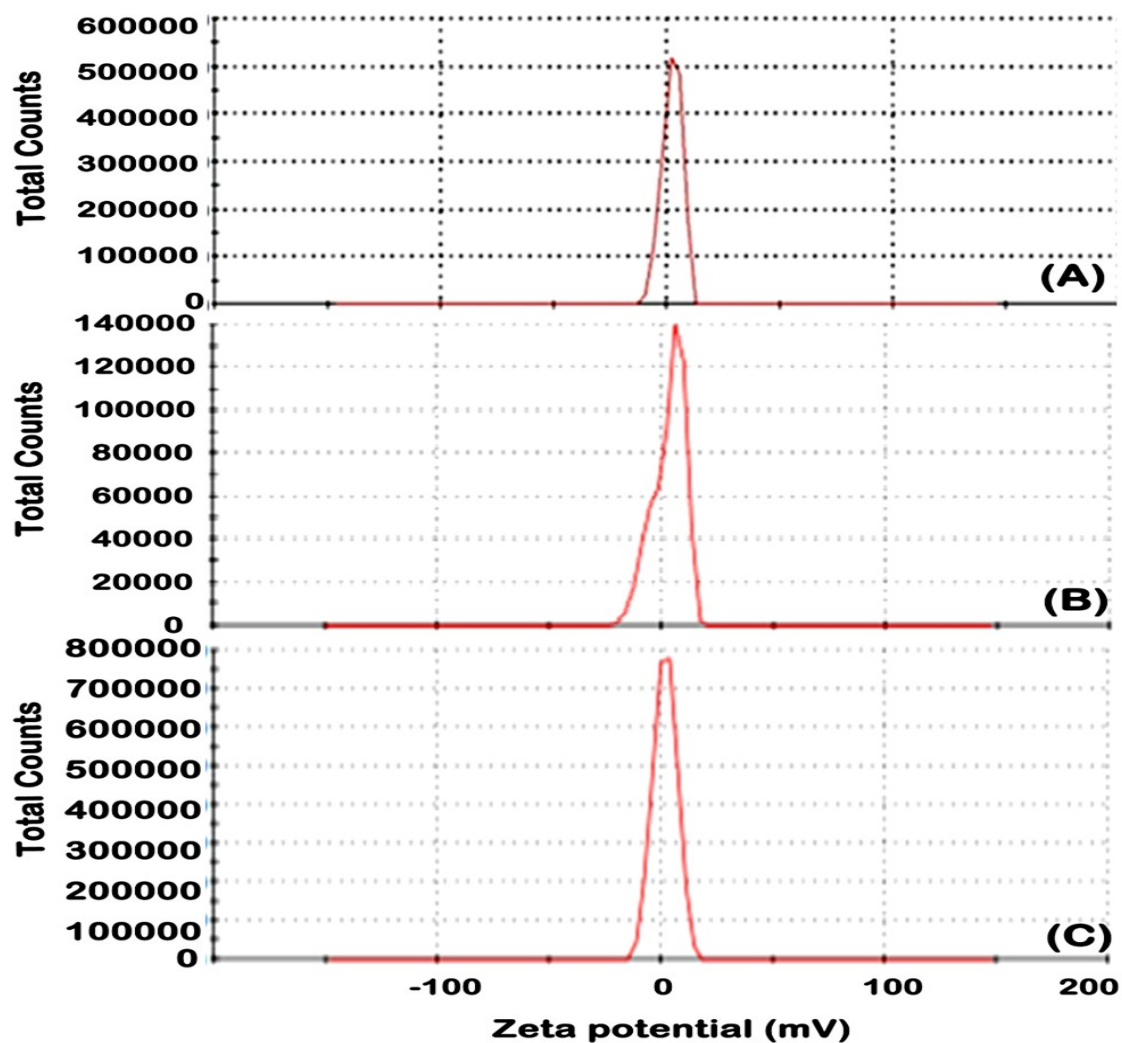

**Supplementary Figure 1.** Zeta particle size distribution peaks: **A)** Chitosan nanoparticles, **B)** *Gymnema sylvestre* leaf extracts derived biomolecule-loaded chitosan nanoparticles (GSCZNPs) and **C)** *Cinnamomum zeylanicum* bark extracts derived biomolecule-loaded chitosan nanoparticles (CZCNPs).

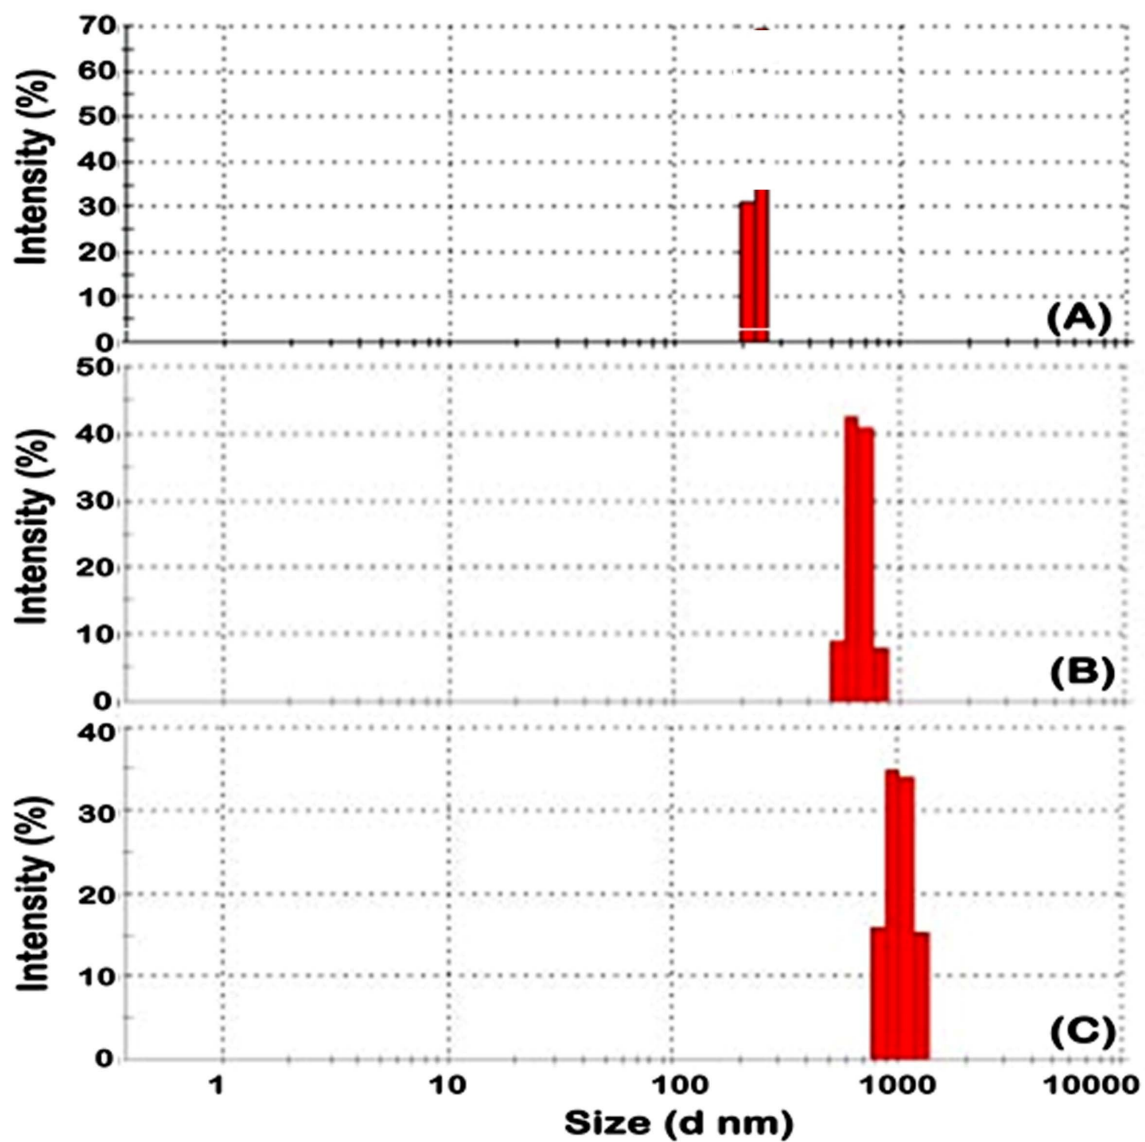

**Supplementary Figure 2.** Results of Particle Density Index: **A)** Chitosan nanoparticles, **B)** *Gymnema sylvestre* leaf extracts derived biomolecule-loaded chitosan nanoparticles (GSCZNPs) and **C)** *Cinnamomum zeylanicum* bark extracts derived biomolecule-loaded chitosan nanoparticles (CZCNPs).
